# Supplementary material
Source: publisher figshare collection journal article supplement (https://gsapubs.figshare.com/articles/dataset/_/12541337)
Supplement: Supplementary file 1 [file 1]

## Sheet: Sheet1
Table DR 1. Sm-Nd isotopic data of the mafic rocks of continental Europe
Bohemian Massif
			Age (Ma)	ℇNd(t)	TDM (Ma)	References
Late Neoproterozoic & Early Paleozoic
Tepla-Barrandian
	1	metabasalt	600	8.72		Pin and Waldhausrova, 2007
	1	metabasalt	600	8		Pin and Waldhausrova, 2007
	1	metbasalt	600	8.7		Pin and Waldhausrova, 2007
	1	metabasalt	600	8.99		Pin and Waldhausrova, 2007
	1	metabasalt	600	9.34		Pin and Waldhausrova, 2007
	1	metabasalt	600	8.77		Pin and Waldhausrova, 2007
	1	metabasalt	600	7.88		Pin and Waldhausrova, 2007
	1	metabasalt	600	8.66		Pin and Waldhausrova, 2007
	1	metabasalt	600	8.74		Pin and Waldhausrova, 2007
	1	metabasalt	600	7.98		Pin and Waldhausrova, 2007
	1	metabasalt	600	8.79		Pin and Waldhausrova, 2007
	1	metabasalt	600	7.86		Pin and Waldhausrova, 2007
	1	metabasalt	600	6.75		Pin and Waldhausrova, 2007
	1	metabasalt	600	7.78		Pin and Waldhausrova, 2007
	1	metabasalt	600	7.92		Pin and Waldhausrova, 2007
	1	metabasalt	600	8.24		Pin and Waldhausrova, 2007
	1	metabasalt	600	3.84		Pin and Waldhausrova, 2007
	1	metabasalt	600	5.19	755	Pin and Waldhausrova, 2007
	1	metabasalt	600	4.97	775	Pin and Waldhausrova, 2007
	1	metabasalt	600	4.34	803	Pin and Waldhausrova, 2007
	1	metabasalt	600	4.44	794	Pin and Waldhausrova, 2007
	1	metabasalt	600	9.2		Dostal et al., 2019
	1	metabasalt	600	9.1		Dostal et al., 2019
	1	metabasalt	600	8	442	Dostal et al., 2019
	1	metabasalt	600	7.9	471	Dostal et al., 2019
	1	basalt	500	7.2		Vokurka and Fryda, 1996
	1	basanite	450	7.6		Vokurka and Fryda, 1996
	1	tephrite	450	7		Vokurka and Fryda, 1996
	1	basanite	450	6		Vokurka and Fryda, 1996
	1	picrite	420	5.8		Vokurka and Fryda, 1996
	1	picrite	420	6		Vokurka and Fryda, 1996
	1	basalt	420	7.2		Vokurka and Fryda, 1996
	1	AOB	420	10.4		Bendl et al., 1993
	1	meimechite	428	5.2	675	Tasaryova et al., 2018
	1	meimechite	428	4.6		Tasaryova et al., 2018
	1	dolerite	428	5		Tasaryova et al., 2018
	1	dolerite	428	5.8		Tasaryova et al., 2018
	1	dolerite	428	5.8	607	Tasaryova et al., 2018
	1	dolerite	428	5.8	605	Tasaryova et al., 2018
	1	dolerite	428	4.6		Tasaryova et al., 2018
	1	dolerite	428	7.4	413	Tasaryova et al., 2018
	1	dolerite	428	5.1		Tasaryova et al., 2018
	1	dolerite	428	5.3		Tasaryova et al., 2018
	1	basalt	428	6.4	528	Tasaryova et al., 2018
	1	basalt	428	6.7	481	Tasaryova et al., 2018
	1	basalt	428	6.3	528	Tasaryova et al., 2018
	1	basalt	428	6.9	467	Tasaryova et al., 2018
	1	basalt	428	6.6	511	Tasaryova et al., 2018
	1	basalt	428	7	456	Tasaryova et al., 2018
	1	basalt	428	6.4	510	Tasaryova et al., 2018
	1	basalt	428	6.4	522	Tasaryova et al., 2018
	1	basalt	428	6.6	503	Tasaryova et al., 2018
	1	basalt	428	5.9	580	Tasaryova et al., 2018
	1	basalt	428	5.6	597	Tasaryova et al., 2018
	1	basalt	428	6.7	482	Tasaryova et al., 2018
	1	basalt	428	5.9	582	Tasaryova et al., 2018
	1	basalt	428	6.5	503	Tasaryova et al., 2018
	1	basalt	428	5.5	643	Tasaryova et al., 2018
	1	basalt	428	6	553	Tasaryova et al., 2018
	1	basalt	428	6.7	496	Tasaryova et al., 2018
	1	basalt	428	6	584	Tasaryova et al., 2018
	1	basalt	428	5.3	636	Tasaryova et al., 2018
	1	basalt	428	5.2	707	Tasaryova et al., 2018
	1	basalt	428	5.4	690	Tasaryova et al., 2018
	1	basalt	428	5.7	643	Tasaryova et al., 2018
	1	basalt	428	6	591	Tasaryova et al., 2018
	1	basalt	428	5.1	753	Tasaryova et al., 2018
	1	basalt	428	6.2	562	Tasaryova et al., 2018
	1	basalt	428	6.2	567	Tasaryova et al., 2018
	1	basalt	428	6.4	526	Tasaryova et al., 2018
	1	basalt	428	7.5		Tasaryova et al., 2018
	1	basalt	428	5.6	655	Tasaryova et al., 2018
	1	basalt	428	6.9	465	Tasaryova et al., 2018
	1	basalt	428	5.3	717	Tasaryova et al., 2018
	1	basalt	425	4.9	766	Dostal et al., 2019
	1	basalt	445	5.1	778	Dostal et al., 2019
	1	basalt	445	5.7	648	Dostal et al., 2019
	1	basalt	420	6.8	468	Dostal et al., 2019
	1	basalt	433	6	585	Dostal et al., 2019
Moldanubian
	1	amphibolite	500	8.63		Janousek et al., 2008
	1	amphibolite	500	8.59	304	Janousek et al., 2008
	1	amphibolite	500	4.46	715	Janousek et al., 2008
	1	amphibolite	500	4.54	709	Janousek et al., 2008
	1	amphibolite	500	9.1	213	Janousek et al., 2008
	1	amphibolite	500	9		Janousek et al., 2008
	1	metagabbro	500	4.9	791	Timmermann et al., 2004
	1	metabasite	500	4.6	782	Timmermann et al., 2004
	1	eclogite	500	6.8		Timmermann et al., 2004
	1	eclogite	500	7.7		Timmermann et al., 2004
	1	eclogite	496	8.7		Beard et al., 1995
	1	eclogite	496	10.2		Beard et al., 1995
	1	garnet amphibolite	496	3.7		Beard et al., 1995
	1	garnet amphibolite	496	8		Beard et al., 1995
	1	metagabbro	496	6.3		Beard et al., 1995
	1	garnet amphibolite	496	4.5		Beard et al., 1995
	1	garnet amphibolite	496	6.5		Beard et al., 1995
	1	amphibolite	530	7.1		Soejono et al., 2010
	1	amphibolite	530	6.6		Soejono et al., 2010
	1	amphibolite	530	5.3		Soejono et al., 2010
	1	gabbro	530	9.6		Soejono et al., 2010
	1	gabbro	530	9.5		Soejono et al., 2010
	1	gabbro	530	9.3		Soejono et al., 2010
Late Paleozoic
	1	trachybasalt	290	-6.13	1366	Ulrych et al., 2004
	1	basalt	290	-3.37	1158	Ulrych et al., 2004
	1	basalt	290	-2.69	1080	Ulrych et al., 2004
	1	andesite	290	-3.32	1137	Ulrych et al., 2004
	1	basalt	292	-3.2	1083	Dostal et al. 2019
	1	basalt	297	-2.6	1179	Dostal et al. 2019
	1	basalt	295	-2.7	1138	Dostal et al. 2019
	1	basalt	300	-3.3	1187	Dostal et al. 2019
	1	basalt	298	-3.7	1237	Dostal et al. 2019
	1	lamproid	330	-7.79	1361	Krmicek et al., 2016
	1	lamproid	330	-6.85	1233	Krmicek et al., 2016
	1	lamproid	330	-3.07	928	Krmicek et al., 2016
	1	lamproid	330	-2.77	910	Krmicek et al., 2016
	1	lamproid	330	-3.79	1039	Krmicek et al., 2016
	1	lamproid	330	-5.53	1214	Krmicek et al., 2016
	1	lamproid	330	-5.35	1186	Krmicek et al., 2016
	1	lamproid	330	-5.45	1170	Krmicek et al., 2016
	1	lamproid	330	-5	1077	Krmicek et al., 2016
	1	minette	330	-7.2	1567	Janousek et al., 1995
	1	minette	330	-6.9	1626	Janousek et al., 1995
	1	durbachite	330	-7.2	1597	Janousek et al., 1995
	1	durbachite	330	-7.2	1503	Janousek et al., 1995
	1	durbachite	330	-7.8	1610	Janousek et al., 1995
	1	monzonite	330	-3.12	1204	Janousek et al., 1995
	1	monzonite	330	-3.4	1397	Janousek et al., 1995
	1	pyroxenite	337	-5.37	1563	Trubac et al., 2015
	1	pyroxenite	337	-5.39	1625	Trubac et al., 2015
	1	pyroxenite	337	-5.59	1813	Trubac et al., 2015
	1	minette	330	-2.59	1031	Gerdes et al., 2000
	1	gabbro	330	-4.28	1134	Gerdes et al., 2000
	1	gabbro	330	-4.23	1319	Gerdes et al., 2000
	1	mafic enclave	330	-4.81	1169	Gerdes et al., 2000
	1	mafic enclave	330	-4.58	1255	Gerdes et al., 2000
	1	mafic enclave	330	-4.74	1441	Gerdes et al., 2000
Cenozoic
	1	basanite	30	4.57	304	Ulrych et al., 2002
	1	basanite	30	2.65	446	Ulrych et al., 2002
	1	basanite	30	4.75	298	Ulrych et al., 2002
	1	basanite	30	4.68	288	Ulrych et al., 2002
	1	basanite	30	3.79	371	Ulrych et al., 2002
	1	basanite	30	4.76	288	Ulrych et al., 2002
	1	basanite	30	4.54	310	Ulrych et al., 2002
	1	melilitite	0.43	4.41	279	Skala et al., 2015
	1	melilitite	1.01	4.5	269	Skala et al., 2015
	1	melilitite	16.5	4.03	347	Skala et al., 2015
	1	melilitite	7.23	3.82	295	Skala et al., 2015
	1	melilitite	26.9	3.28	398	Skala et al., 2015
	1	melilitite	32.3	4.81	359	Skala et al., 2015
	1	melilitite	65	4.36	337	Skala et al., 2015
	1	melilitite	68	3.98	342	Skala et al., 2015
	1	melilitite	63	4.39	318	Skala et al., 2015
	1	melilitite	63	3.13	374	Skala et al., 2015
	1	melilitite	62	5.15	291	Skala et al., 2015
	1	melilitite	68.8	3.67	375	Skala et al., 2015
	1	melilitite	60.5	3.3	370	Skala et al., 2015
	1	nephelinite	30	3.23	396	Bendl et al., 1993
	1	basanite	30	4.14	359	Bendl et al., 1993
	1	basanite	30	3.44	363	Bendl et al., 1993
	1	AOB	30	3.9	330	Bendl et al., 1993
	1	AOB	30	4.57	314	Bendl et al., 1993
	1	nephelinite	30	4.86	283	Bendl et al., 1993
	1	AOB	30	3.94	335	Bendl et al., 1993
	1	basanite	30	3.24	401	Dostal et al., 2017
	1	basanite	30	3.35	399	Dostal et al., 2017
	1	basanite	30	4.32	306	Dostal et al., 2017
	1	trachybasalt	30	2.54	445	Dostal et al., 2017
	1	melilitite	30	3.21	352	Dostal et al., 2017
	1	alkali gabbro	30	3.33	420	Holub et al., 2010
	1	urtite	30	3.35	341	Holub et al., 2010
	1	essexite	30	2.11	476	Holub et al., 2010
	1	monzosyenite	30	1.49	458	Holub et al., 2010
	1	basanite	21.2	4.1	361	Ackerman et al., 2013
	1	basanite	23.5	4.1	347	Ackerman et al., 2013
	1	basanite	22.1	4.7	291	Ackerman et al., 2013
	1	nephelinite	18.4	3.9	326	Ulrych et al., 2010
	1	nephelinite	29.3	4.9	291	Ulrych et al., 2010
	1	nephelinite	11.9	3.4	351	Ulrych et al., 2010
	1	nephelinite	16.9	3.7	335	Ulrych et al., 2010
	1	nephelinite	13.5	3.3	367	Ulrych et al., 2010
	1	nephelinite	25.6	4	341	Ulrych et al., 2010
	1	nephelinite	24.2	2.9	406	Ulrych et al., 2010
	1	nephelinite	28.5	3.1	406	Ulrych et al., 2010
	1	nephelinite	18.1	4	322	Ulrych et al., 2010
	1	nephelinite	21.5	4.3	317	Ulrych et al., 2010
	1	nephelinite	20	2.4	424	Ulrych et al., 2010
	1	nephelinite	17.1	5.1	291	Ulrych et al., 2010
	1	nephelinite	20.5	5.5	242	Ulrych et al., 2010
	1	nephelinite	20	4.3	313	Ulrych et al., 2010
	1	nephelinite	15.4	2.6	379	Ulrych et al., 2010
	1	AOB	16.5	3.43	360	Ulrych et al., 2016
	1	tephrite	10.2	2.58	394	Ulrych et al., 2016
	1	tephrite	6.5	2.81	389	Ulrych et al., 2016
	1	tephrite	16.5	3.37	369	Ulrych et al., 2016
	1	tephrite	10	2.75	398	Ulrych et al., 2016
	1	nephelinite	6.25	3.39	364	Ulrych et al., 2016
	1	basanite	1	4.2	304	Ulrych et al., 2016
	1	nephelinite	16.5	5.12	271	Ulrych et al., 2016
	1	basanite	29.5	3.42	361	Ulrych et al., 2016
	1	melilitite	64	3.6	371	Ulrych et al., 2008
	1	melilitite	61	3.76	366	Ulrych et al., 2008
	1	melilitite	65	4.36	338	Ulrych et al., 2008
	1	melilitite	68	3.98	342	Ulrych et al., 2008
	1	melilitite	63	4.55	308	Ulrych et al., 2008
	1	melilitite	64	4.29	326	Ulrych et al., 2008
	1	melilitite	63	3.13	374	Ulrych et al., 2008
	1	melilitite	64	5.09	296	Ulrych et al., 2008
	1	melilitite	62	5.14	292	Ulrych et al., 2008
	1	melilitite	59	4.86	304	Ulrych et al., 2008
	1	basanite	2.4	4.34	294	Ulrych et al., 2013
	1	basanite	1.03	4.38	291	Ulrych et al., 2013
	1	basanite	3.05	4.79	291	Ulrych et al., 2013
	1	basanite	2.45	4.69	293	Ulrych et al., 2013
	1	basanite	2.47	4.63	291	Ulrych et al., 2013
	1	basanite	2.89	4.83	285	Ulrych et al., 2013
	1	basanite	1.73	4.68	293	Ulrych et al., 2013
	1	basanite	5.73	4.69	273	Ulrych et al., 2013
	1	melilitite	0.43	4.41	281	Ulrych et al., 2013
	1	melilitite	0.43	4.08	305	Ulrych et al., 2013
	1	melilitite	19.5	1.68	501	Ulrych et al., 2013
	1	melilitite	1.01	4.54	267	Ulrych et al., 2013
	1	melilitite	1.01	4.5	269	Ulrych et al., 2013
	1	basanite	23.7	5.27	230	Ulrych et al., 2013
	1	basanite	23.7	5.3	234	Ulrych et al., 2013
	1	basanite	22.4	4.94	248	Ulrych et al., 2013
	1	nephelinite	17.9	5.25	249	Ulrych et al., 2013
	1	basanite	24	3.75		Hasse and Renno, 2008
	1	basanite	24	3.94		Hasse and Renno, 2008
	1	basanite	24	3.16		Hasse and Renno, 2008
	1	basanite	24	3.55		Hasse and Renno, 2008
	1	basanite	19	4.53		Hasse and Renno, 2008
	1	basanite	24	3.94		Hasse and Renno, 2008
	1	basanite	24	3.94		Hasse and Renno, 2008
	1	basanite	24	3.36		Hasse and Renno, 2008
	1	basanite	24	3.55		Hasse and Renno, 2008
	1	basanite	24	3.16		Hasse and Renno, 2008
	1	basanite	18	2.97		Hasse and Renno, 2008
	1	basanite	0.5	4.33		Hasse and Renno, 2008
	1	nephelinite	0.1	4.33	287	Brandl et al., 2015
	1	nephelinite	0.1	4.37	288	Brandl et al., 2015

## Sheet: Sheet2
Bohemian Massif Saxothuringian
			Age (Ma)	ℇNd(t)	TDM (Ma)	References
Late Neoproterozoic - Early Paleozoic
	1	metabasalt	485	7.74		Patocka and Pin, 2005
	1	metabasalt	485	6.68		Patocka and Pin, 2005
	1	metabasalt	485	7.64		Patocka and Pin, 2005
	1	metabasalt	485	7.42		Patocka and Pin, 2005
	1	metabasalt	485	3.24		Patocka and Pin, 2005
	1	metabasalt	485	6.17	572	Patocka and Pin, 2005
	1	metabasalt	485	6.07	582	Patocka and Pin, 2005
	1	metabasalt	485	7.17	479	Patocka and Pin, 2005
	1	metabasalt	485	5.91	600	Patocka and Pin, 2005
	1	metabasalt	500	7.42		Pin et al., 2007
	1	metabasalt	500	7.05		Pin et al., 2007
	1	metabasalt	500	6.26		Pin et al., 2007
	1	metabasalt	500	5.64		Pin et al., 2007
	1	metabasalt	500	7.59		Pin et al., 2007
	1	metabasalt	500	7.91		Pin et al., 2007
	1	metabasalt	500	7.54		Pin et al., 2007
	1	metabasalt	500	6.66		Dostal et al., 2001
	1	metabasalt	500	5.75		Dostal et al., 2001
	1	metabasalt	500	3.18	768	Dostal et al., 2001
	1	metabasalt	500	2.85	836	Furnes et al., 1994
	1	metabasalt	500	3.72	765	Furnes et al., 1994
	1	metabasalt	500	3.03	782	Furnes et al., 1994
	1	metabasalt	500	6	653	Furnes et al., 1994
	1	metabasalt	500	6.35	584	Furnes et al., 1994
	1	metabasalt	500	6.21	604	Furnes et al., 1994
	1	metabasalt	500	5.79	634	Furnes et al., 1994
	1	metabasalt	500	5.38	677	Furnes et al., 1994
	1	metabasalt	500	6.74		Furnes et al., 1994
	1	metabasalt	500	4.19	788	Furnes et al., 1994
	1	metabasalt	420	4.55	763	Furnes et al., 1994
	1	metabasalt	420	8.18		Furnes et al., 1994
	1	metabasalt	420	7.89		Furnes et al., 1994
	1	metabasalt	420	6.94		Furnes et al., 1994
	1	metabasalt	420	8.74		Furnes et al., 1994
	1	metabasalt	420	3.24	917	Furnes et al., 1994
	1	metabasalt	420	5.31	692	Furnes et al., 1994
	1	metabasalt	420	6.42		Furnes et al., 1994
	1	metabasalt	500	5.72	677	Hegner and Kroner, 2000
	1	amphibolite	530	6.72	558	Ilnicki et al., 2013
	1	amphibolite	530	4.78		Ilnicki et al., 2013
	1	amphibolite	530	6.73		Ilnicki et al., 2013
	1	amphibolite	530	2.22	883	Ilnicki et al., 2013
	1	amphibolite	530	7.86		Ilnicki et al., 2013
	1	amphibolite	500	5.43		Kryza and Pin, 2002
	1	amphibolite	500	6.24		Kryza and Pin, 2002
	1	amphibolite	500	4.72		Kryza and Pin, 2002
	1	metagabbro	400	8.1		Kryza and Pin, 2010
	1	metagabbro	400	8.2		Kryza and Pin, 2010
	1	metagabbro	400	8.3		Kryza and Pin, 2010
	1	metagabbro	400	8.1		Kryza and Pin, 2010
	1	metabasalt	400	8.7		Kryza and Pin, 2010
	1	metabasalt	400	8.7		Kryza and Pin, 2010
	1	metagabbro	400	8.2		Kryza and Pin, 2010
	1	metagabbro	400	7.8		Kryza and Pin, 2010
	1	metagabbro	400	8.1		Kryza and Pin, 2010
	1	metagabbro	400	8.3		Kryza and Pin, 2010
	1	metagabbro	400	8.5		Kryza and Pin, 2010
	1	metagabbro	400	8.4		Kryza and Pin, 2010
	1	metabasalt	400	8.6		Kryza and Pin, 2010
	1	metabasalt	400	8.4		Kryza and Pin, 2010
	1	metabasalt	400	8.4		Kryza and Pin, 2010
	1	metabasalt	400	8.1		Kryza and Pin, 2010
	1	metabasalt	500	8.9		Crowley et al., 2002
	1	metabasalt	500	5.21	702	Crowley et al., 2002
	1	metabasalt	500	6.14	619	Crowley et al., 2002
	1	metabasalt	500	3.07	812	Crowley et al., 2002
	1	metabasalt	500	6.52	548	Crowley et al., 2002
	1	metabasalt	500	7.79	417	Crowley et al., 2002
	1	metabasalt	500	7.02	504	Crowley et al., 2002
	1	metabasalt	500	6.93		Crowley et al., 2002
	1	metabasalt	500	5.44		Crowley et al., 2002
	1	metabasalt	500	6.65		Crowley et al., 2002
	1	metabasalt	500	7.3		Crowley et al., 2002
	1	metabasalt	500	9.13		Crowley et al., 2002
	1	metabasalt	500	6.74		Crowley et al., 2002
	1	metabasalt	500	8.86		Crowley et al., 2002
	1	metabasalt	500	8.22		Crowley et al., 2002
	1	metabasalt	500	8.84		Crowley et al., 2002
	1	metabasalt	500	8.81		Crowley et al., 2002
	1	metabasalt	500	7.15		Crowley et al., 2002
	1	metabasalt	500	7.01		Crowley et al., 2002
	1	metabasalt	500	4.04		Crowley et al., 2002
	1	Amphibolite	570	5.32		Linnemann and Romer, 2002
	1	Amphibolite	570	8.19		Linnemann and Romer, 2002
	1	Metabasalt	580	7.8		Kroner et al., 1995
	1	Metabasalt	500	4.81		Bankwitz et al., 1994
	1	Metabasalt	500	7.65		Bankwitz et al., 1994
	1	Metabasalt	500	5		Bankwitz et al., 1994
	1	Gabbro	500	6.25		Bankwitz et al., 1994
	1	Gabbro	500	6.37	582	Bankwitz et al., 1994
	1	Metabasalt	500	3.29	873	Bankwitz et al., 1994
	1	Eclogite	360	6.2		Schmadicke et al., 1995
	1	Eclogite	360	7		Schmadicke et al., 1995
	1	Eclogite	360	6.8		Schmadicke et al., 1995
	1	Eclogite	360	4.3		Schmadicke et al., 1995
Late Paleozoic
	1	basalt	290	-2.99	1110	Ulrych et al., 2002
	1	basalt	290	-3.57	1163	Ulrych et al., 2002
	1	basalt	290	-2.61	957	Ulrych et al., 2002
	1	basalt	290	-2.96	1112	Ulrych et al., 2002
	1	basalt	290	-2.8	1124	Ulrych et al., 2002
	1	bas.andesit	290	-2.69	1080	Ulrych et al., 2002
	1	bas.andesite	290	-3.46	1163	Ulrych et al., 2002
	1	lamproid	330	-6.49	1195	Krmicek et al., 2016
	1	lamproid	330	-6.55	1246	Krmicek et al., 2016
	1	lamproid	330	-5.67	1049	Krmicek et al., 2016
	1	lamproid	330	-5.66	1057	Krmicek et al., 2016
	1	lamprophyre	330	-0.7		Abdelfadil et al., 2014
	1	lamprophyre	330	-8.1		Abdelfadil et al., 2014
	1	lamprophyre	330	-6.8		Abdelfadil et al., 2014
	1	lamprophyre	320	2.2		Abdelfadil et al., 2014
	1	lamprophyre	320	-2.2		Abdelfadil et al., 2014
	1	lamprophyre	320	-1.1		Abdelfadil et al., 2014
	1	lamprophyre	310	0.6		Abdelfadil et al., 2014
	1	lamprophyre	310	-1.8		Abdelfadil et al., 2014
	1	lamprophyre	320	-0.99	954	Slaby and Martin, 2008
	1	lamprophyre	320	-1.33	867	Slaby and Martin, 2008
	1	lamprophyre	300	0.52	763	Adwankiewicz, 2007
	1	lamprophyre	300	-2.74	945	Adwankiewicz, 2007
	1	lamprophyre	300	-2.46	965	Adwankiewicz, 2007
	1	lamprophyre	300	-1.35	901	Adwankiewicz, 2007
	1	lamprophyre	300	-2.26	1054	Adwankiewicz, 2007
	1	lamprophyre	300	0.55	790	Adwankiewicz, 2007
	1	lamprophyre	300	-1.49	890	Adwankiewicz, 2007
	1	lamprophyre	300	-1.89	991	Adwankiewicz, 2007
	1	lamprophyre	300	-8.24	1740	Adwankiewicz, 2007
	1	lamprophyre	300	-8.29	1978	Adwankiewicz, 2007
	1	lamprophyre	300	-7.21	1274	Adwankiewicz, 2007
	1	lamprophyre	300	-1.14	867	Adwankiewicz, 2007
	1	lamprophyre	300	-4.21	1066	Adwankiewicz, 2007
	1	lamprophyre	300	-4.71	1254	Adwankiewicz, 2007
	1	lamprophyre	300	-4.97	1237	Adwankiewicz, 2007
	1	lamprophyre	330	-3.4		Abdelfadil et al., 2014
	1	lamprophyre	330	-3.5		Abdelfadil et al., 2014
	1	lamprophyre	330	-4.8		Abdelfadil et al., 2014
	1	lamprophyre	330	-3.1		Abdelfadil et al., 2014
	1	lamprophyre	325	-2.8		Abdelfadil et al., 2014
	1	lamprophyre	320	-3.9		Abdelfadil et al., 2014
	1	lamprophyre	296	-4.5		Abdelfadil et al., 2014
	1	lamprophyre	296	-4		Abdelfadil et al., 2014
	1	lamprophyre	295	-4.1		Abdelfadil et al., 2014
	1	lamprophyre	335	-4.5	1394	Abdelfadil et al., 2014
	1	lamprophyre	335	-4.5	1427	Abdelfadil et al., 2014
	1	lamprophyre	330	-0.1	986	Abdelfadil et al., 2014
	1	lamprophyre	330	-3.1	1131	Abdelfadil et al., 2014
	1	lamprophyre	330	0.7	877	Abdelfadil et al., 2014
	1	lamprophyre	325	-2	1040	Abdelfadil et al., 2014
Cenozoic
	1	basalt	30	7.17	164	Adwankiewicz et al., 2016
	1	basalt	30	6.48	235	Adwankiewicz et al., 2016
	1	nephelinite	30	5.17	254	Adwankiewicz et al., 2016
	1	nephelinite	30	5.03	274	Adwankiewicz et al., 2016
	1	trachybasalt	30	7.41	145	Adwankiewicz et al., 2016
	1	trachybasalt	30	7.25	139	Adwankiewicz et al., 2016
	1	basanite	30	6.16	180	Blusztajn and Hart, 1989
	1	AOB	30	6.77	168	Blusztajn and Hart, 1989
	1	nephelinite	30	5.28	250	Blusztajn and Hart, 1989
	1	nephelinite	30	6.35	188	Blusztajn and Hart, 1989
	1	basanite	30	6.54	182	Blusztajn and Hart, 1989
	1	basanite	30	7.11	126	Blusztajn and Hart, 1989
	1	basanite	30	6.3	182	Blusztajn and Hart, 1989
	1	basanite	30	5.26	250	Blusztajn and Hart, 1989
	1	nephelinite	30	6.09	210	Blusztajn and Hart, 1989
	1	nephelinite	30	5.69	277	Blusztajn and Hart, 1989
	1	basanite	30	7.65	103	Blusztajn and Hart, 1989
	1	basanite	30	5.04	290	Blusztajn and Hart, 1989
	1	nephelinite	30	4.51	294	Blusztajn and Hart, 1989
	1	basanite	30	6.5	195	Blusztajn and Hart, 1989
	1	basanite	30	7.55	121	Blusztajn and Hart, 1989
	1	basanite	30	6.03	199	Blusztajn and Hart, 1989
	1	basanite	30	5.47	259	Blusztajn and Hart, 1989
	1	AOB	30	6.85	181	Blusztajn and Hart, 1989
	1	nephelinite	41	4.39	311	Alibert et al., 1987
	1	nephelinite	30	3.14	394	Alibert et al., 1987
	1	nephelinite	30	4.87	263	Alibert et al., 1987
	1	basanite	20	4.53	285	Alibert et al., 1987
	1	basanite	30	4.38	31	Alibert et al., 1987
	1	basanite	30	4.35	298	Alibert et al., 1987
	1	hawaiite	30	5.1	235	Alibert et al., 1987

## Sheet: Sheet3
Southern Germany (Schwarzwald, Odenwald, Spessart)- Northeastern France (Vosges)
			Age (Ma)	ℇNd(t)	TDM (Ma)	References
Neoprotorozoic to Early Paleozoic
	1	Metabasalt	480	7.84		Teipel et al., 2004
	1	Eclogite	480	8.7		Stosch and Lugmair, 1990
	1	Eclogite	424	7.5		Quant and Gebauer, 1993
	1	Gabbro	349	6.25		Hegner et al., 2001
	1	amphibolite	500	5.83		Teichmann and Basu, 1996
	1	amphibolite	500	5.38	739	Teichmann and Basu, 1996
	1	gabbro	360	3.44		Altherr et al., 1999
	1	gabbro	360	3.37	718	Altherr et al., 1999
	1	gabbro	360	3.74	713	Altherr et al., 1999
	1	gabbro	360	3.69	774	Altherr et al., 1999
	1	basalt	370	5.38	546	Tabaud et al., 2014
	1	metabasalt	372	7.55		Skrzypek et al., 2012
Late Paleozoic
	1	lamprophyre	320	-3.9	996	Soder and Romer, 2018
	1	lamprophyre	320	-3.4	1049	Soder and Romer, 2018
	1	lamprophyre	320	-2.1	905	Soder and Romer, 2018
	1	lamprophyre	320	-2.3	935	Soder and Romer, 2018
	1	lamprophyre	320	-2.5	944	Soder and Romer, 2018
	1	lamprophyre	320	-1.1	826	Soder and Romer, 2018
	1	lamprophyre	320	-1.2	930	Soder and Romer, 2018
	1	lamprophyre	320	-2	908	Soder and Romer, 2018
	1	lamprophyre	320	-2.1	924	Soder and Romer, 2018
	1	lamprophyre	320	-3	1179	Soder and Romer, 2018
	1	lamprophyre	320	-5	1250	Soder and Romer, 2018
	1	lamprophyre	320	-4.1	1370	Soder and Romer, 2018
	1	lamprophyre	320	-2.2	917	Soder and Romer, 2018
	1	lamprophyre	320	-1.6	966	Soder and Romer, 2018
	1	lamprophyre	320	-2.2	899	Soder and Romer, 2018
	1	lamprophyre	320	-2.4	917	Soder and Romer, 2018
	1	lamprophyre	320	-3.7	1214	Soder and Romer, 2018
	1	lamprophyre	320	-1.5	947	Soder and Romer, 2018
	1	lamprophyre	320	-5.5	1563	Soder and Romer, 2018
	1	lamprophyre	320	-2.2	1032	Soder and Romer, 2018
	1	lamprophyre	320	-7.1	1609	Soder and Romer, 2018
	1	lamprophyre	320	-6.4	1716	Soder and Romer, 2018
	1	lamprophyre	320	-4.9	1226	Soder and Romer, 2018
	1	lamprophyre	320	-4.4	1175	Soder and Romer, 2018
	1	lamprophyre	320	-5	1240	Soder and Romer, 2018
	1	lamprophyre	320	-1.6	861	Soder and Romer, 2018
	1	lamprophyre	320	-2.7	965	Soder and Romer, 2018
	1	lamprophyre	320	-3.1	943	Soder and Romer, 2018
	1	lamprophyre	320	-0.7	821	Soder and Romer, 2018
	1	lamprophyre	320	-3.3	1131	Soder and Romer, 2018
	1	lamprophyre	320	-3.3	1029	Soder and Romer, 2018
	1	lamprophyre	320	-1.9	867	Soder and Romer, 2018
	1	lamprophyre	320	-5.9	1783	Soder and Romer, 2018
	1	lamprophyre	320	-7.5	2483	Soder and Romer, 2018
	1	lamprophyre	320	-4.1	1304	Soder and Romer, 2018
	1	lamprophyre	320	-6.4	1672	Soder and Romer, 2018
	1	amphibolite	342	-3.09		Hegner et al., 2002
	1	amphibolite	342	-5.98		Hegner et al., 2002
	1	andesite	320	-5.5	1424	Hegner et al., 1998
	1	andesite	320	-5.2	1406	Hegner et al., 1998
	1	andesite	320	-5.3	1592	Hegner et al., 1998
	1	basalt	320	-4.4	1199	Hegner et al., 1998
	1	bas. andesite	320	-6.8	1407	Hegner et al., 1998
	1	basalt	320	-4.9	1304	Hegner et al., 1998
	1	basalt	320	-4.5	1347	Hegner et al., 1998
	1	bas. andesite	320	-5.3	1526	Hegner et al., 1998
	1	basalt	320	-4.6	1475	Hegner et al., 1998
	1	bas. andesite	320	-5.1	1347	Hegner et al., 1998
	1	andesite	320	-4	1170	Hegner et al., 1998
	1	basalt	320	-2.3	1030	Hegner et al., 1998
	1	andesite	320	-5.2	1415	Hegner et al., 1998
	1	bas. andesite	320	-4.8	1487	Hegner et al., 1998
	1	andesite	320	-5.5	1454	Hegner et al., 1998
	1	Diorite/gabbro	340	-1.71	1608	Altherr et al., 2000
	1	Diorite/gabbro	340	-2.81	1307	Altherr et al., 2000
	1	Diorite/gabbro	340	-1.74	1144	Altherr et al., 2000
	1	minette	295	-3.53	1003	Turpin et al., 1988
	1	minette	295	-5.16	1406	Turpin et al., 1988
	1	kersantite	295	-2.93	851	Turpin et al., 1988
	1	kersantite	295	-1.87	819	Turpin et al., 1988
	1	durbachite	310	-2.2		Tabaud et al., 2014
	1	durbachite	310	-3.6		Tabaud et al., 2014
	1	amphibolite	325	-4.56	1239	Altherr et al., 1999
	1	amphibolite	325	-5.05	1532	Altherr et al., 1999
	1	amphibolite	325	-4.04	1498	Altherr et al., 1999
	1	amphibolite	325	-1.16	1048	Altherr et al., 1999
	1	amphibolite	325	-2.56	1206	Altherr et al., 1999
	1	amphibolite	325	-2.82	1093	Altherr et al., 1999
	1	amphibolite	325	-1.96	1202	Altherr et al., 1999
	1	lamprophyre	290	-3.1	995	Stille et al., 1989
	1	lamprophyre	290	-4.95	1381	Stille et al., 1989
	1	basalt	295	-5.28	1096	von Seckendorff et al., 2004
	1	basalt	295	-2.18	1009	von Seckendorff et al., 2004
	1	basalt	295	-3.08	1028	von Seckendorff et al., 2004
	1	basalt	295	-6.81	1165	von Seckendorff et al., 2004
	1	basalt	295	-0.49	1189	von Seckendorff et al., 2004
	1	basalt	295	-3.18	1210	von Seckendorff et al., 2004
	1	basalt	300	-2.2	1176	Schmidberger and Hegner, 1999
	1	basalt	300	-1.1	1032	Schmidberger and Hegner, 1999
	1	basalt	300	-0.7	1086	Schmidberger and Hegner, 1999
	1	basalt	300	-2.7	1025	Schmidberger and Hegner, 1999
	1	basalt	300	-3	1042	Schmidberger and Hegner, 1999
	1	basalt	300	-2.3	1032	Schmidberger and Hegner, 1999
	1	basalt	300	-1.8	1080	Schmidberger and Hegner, 1999
	1	basalt	300	-2	1071	Schmidberger and Hegner, 1999
	1	basalt	300	-1.8	1051	Schmidberger and Hegner, 1999
	1	basalt	300	-2.1	978	Schmidberger and Hegner, 1999
	1	basalt	300	-2.4	1077	Schmidberger and Hegner, 1999
	1	basalt	300	-0.7	1130	Schmidberger and Hegner, 1999
	1	basalt	300	-3.3	1089	Schmidberger and Hegner, 1999
	1	basalt	300	-2.3	1088	Schmidberger and Hegner, 1999
	1	basalt	300	-2.5	1104	Schmidberger and Hegner, 1999
	1	basalt	300	-5.95	1270	Romer et al., 2001
	1	basalt	300	-0.9	806	Romer et al., 2001
Cenozoic
	1	melilitite	16	3.83	315	Hegner et al., 1995
	1	melilitite	16	4.21	281	Hegner et al., 1995
	1	melilitite	16	4.01	302	Hegner et al., 1995
	1	melilitite	16	4.44	272	Hegner et al., 1995
	1	melilitite	16	4.65	262	Hegner et al., 1995
	1	melilitite	16	3.85	307	Hegner et al., 1995
	1	melilitite	16	4.3	282	Hegner et al., 1995
	1	nephelinite	12	3.91	320	Wedepohl et al., 1994
	1	nephelinite	12	3.92	323	Wedepohl et al., 1994
	1	nephelinite	12	4.28	297	Wedepohl et al., 1994
	1	nephelinite	14	4.68	280	Wedepohl et al., 1994
	1	melilitite	15	1.17	473	Alibert et al., 1983
	1	melilitite	20	4.44	660	Alibert et al., 1983
	1	melilitite	20	5.01	253	Alibert et al., 1983
	1	melilitite	20	3.07	407	Alibert et al., 1983
	1	melilitite	20	4.76	269	Alibert et al., 1983
	1	melilitite	20	5.7	205	Alibert et al., 1983
	1	melilitite	20	5.49	217	Alibert et al., 1983
	1	melilitite	20	2.88	390	Alibert et al., 1983
	1	melilitite	20	3.25	358	Alibert et al., 1983
	1	melilitite	20	4.04	302	Alibert et al., 1983
	1	melilitite	60	6.41	198	Alibert et al., 1983
	1	melilitite	16	4.1	295	Wilson et al., 1995
	1	melilitite	16	3.74	315	Wilson et al., 1995
	1	melilitite	16	4.18	313	Wilson et al., 1995
	1	melilitite	16	4.53	287	Wilson et al., 1995
	1	melilitite	16	4.65	207	Wilson et al., 1995
	1	melilitite	16	3.9	317	Wilson et al., 1995
	1	basanite	24	4.64	308	Wedepohl et al., 1994
	1	AOB	24	4.46	370	Wedepohl et al., 1994
	1	AOB	24	4.62	308	Wedepohl et al., 1994
	1	AOB	24	4.34	384	Wedepohl et al., 1994
	1	AOB	24	4.7	334	Wedepohl et al., 1994
	1	AOB	24	4.29	347	Wedepohl et al., 1994
	1	basanite	25	4.22	320	Wedepohl et al., 1994
	1	AOB	25	4.58	322	Wedepohl et al., 1994
	1	AOB	25	3.61	377	Wedepohl et al., 1994
	1	AOB	20	3.64	389	Wedepohl et al., 1994
	1	AOB	20	3.42	405	Wedepohl et al., 1994
	1	AOB	20	2.2	560	Wedepohl et al., 1994
	1	AOB	20	5.23	275	Wedepohl et al., 1994
	1	AOB	20	3.98	329	Wedepohl et al., 1994
	1	nephelinite	20	4.21	329	Wedepohl et al., 1994
	1	nephelinite	22	4.07	353	Wedepohl et al., 1994
	1	neph	22	3.89	399	Wedepohl et al., 1994
	1	Neph	22	4.07	402	Wedepohl et al., 1994
	1	neph	22	3.61	402	Wedepohl et al., 1994
	1	basanite	22	3.63	370	Wedepohl et al., 1994
	1	basanite	22	4.27	315	Wedepohl et al., 1994
	1	basanite	22	3.94	338	Wedepohl et al., 1994
	1	aob	22	4.88	269	Wedepohl et al., 1994
	1	basanite	22	3.63	405	Wedepohl et al., 1994
	1	basanite	24	4.44	343	Hasse et al., 2004
	1	hawaiite	24	3.37	456	Hasse et al., 2004
	1	AOB	20.9	4.57	309	Hasse et al., 2004
	1	basanite	9.3	4.73	275	Hasse et al., 2004
	1	basanite	15.8	2.7	405	Hasse et al., 2004
	1	basanite	18.6	4.11	322	Hasse et al., 2004
	1	AOB	15.3	2.24	492	Hasse et al., 2004
	1	AOB	18.4	2.32	553	Hasse et al., 2004
	1	AOB	24.1	4.63	344	Hasse et al., 2004
	1	basanite	26.8	4.21	375	Hasse et al., 2004
	1	basanite	20	3.31	378	Kolb et al., 2012
	1	basanite	20	3.9	358	Kolb et al., 2012
	1	basanite	20	4.28	336	Kolb et al., 2012
	1	basanite	20	4.68	302	Kolb et al., 2012
	1	basanite	20	4.62	305	Kolb et al., 2012
	1	basanite	20	4.23	333	Kolb et al., 2012
	1	tephrite	20	2.33	432	Kolb et al., 2012
	1	tephrite	20	4.43	307	Kolb et al., 2012
	1	tephrite	20	3.77	356	Kolb et al., 2012
	1	tephrite	20	4.37	315	Kolb et al., 2012
	1	AOB	20	4.57	316	Kolb et al., 2012
	1	AOB	20	3.49	392	Kolb et al., 2012
	1	AOB	20	4.58	308	Kolb et al., 2012
	1	AOB	20	4.59	337	Kolb et al., 2012
	1	OTH	15	4.76	448	Jung and Masberg, 1998
	1	OTH	15	3.63	753	Jung and Masberg, 1998
	1	OTH	15	4.49	455	Jung and Masberg, 1998
	1	nephelinite	15	3.55	419	Jung and Masberg, 1998
	1	nephelinite	15	4.17	420	Jung and Masberg, 1998
	1	nephelinite	15	2.77	644	Jung and Masberg, 1998
	1	nephelinite	15	2.97	537	Jung and Masberg, 1998
	1	nephelinite	15	5.38	279	Jung and Masberg, 1998
	1	basanite	15	2.38	539	Jung and Masberg, 1998
	1	basanite	15	4.31	452	Jung and Masberg, 1998
	1	basanite	15	3.73	459	Jung and Masberg, 1998
	1	basanite	15	3.26	467	Jung and Masberg, 1998
	1	basanite	15	3.45	469	Jung and Masberg, 1998
	1	basanite	15	4.42	384	Jung and Masberg, 1998
	1	basanite	15	5.29	311	Jung and Masberg, 1998
	1	basanite	15	4.06	465	Jung and Masberg, 1998
	1	basanite	15	4.58	318	Jung and Masberg, 1998
	1	nephelinite	40	6.09	250	Jung et al., 2006
	1	nephelinite	40	6.14	218	Jung et al., 2006
	1	nephelinite	40	6.71	163	Jung et al., 2006
	1	nephelinite	40	5.75	232	Jung et al., 2006
	1	nephelinite	40	6.52	171	Jung et al., 2006
	1	nephelinite	40	4.11	356	Jung et al., 2006
	1	nephelinite	40	4.9	333	Jung et al., 2006
	1	nephelinite	40	5.03	306	Jung et al., 2006
	1	nephelinite	40	5.31	265	Jung et al., 2006
	1	nephelinite	40	3.97	368	Jung et al., 2006
	1	nephelinite	40	5.06	308	Jung et al., 2006
	1	nephelinite	40	5.33	325	Jung et al., 2006
	1	basanite	40	5.63	253	Jung et al., 2006
	1	basanite	40	6.65	181	Jung et al., 2006
	1	basanite	40	5.32	286	Jung et al., 2006
	1	basanite	40	6.05	215	Jung et al., 2006
	1	basanite	40	5.82	249	Jung et al., 2006
	1	basanite	40	5.4	350	Jung et al., 2006
	1	basanite	40	5.14	351	Jung et al., 2006
	1	basanite	40	6.28	271	Jung et al., 2006
	1	basanite	40	5.88	323	Jung et al., 2006
	1	basanite	40	5.74	285	Jung et al., 2006
	1	basanite	40	5.42	333	Jung et al., 2006
	1	basanite	40	5.74	360	Jung et al., 2006
	1	basanite	40	4.84	345	Jung et al., 2006
	1	basanite	40	6.78	158	Jung et al., 2006
	1	basanite	40	3.05	602	Jung et al., 2006
	1	basanite	40	3.98	436	Jung et al., 2006
	1	basanite	40	3.05	474	Jung et al., 2006
	1	basanite	40	4.21	562	Jung et al., 2006
	1	basanite	40	3.24	574	Jung et al., 2006
	1	basanite	40	4.23	357	Jung et al., 2006
	1	AOB	40	4.26	418	Jung et al., 2006
	1	AOB	40	3.21	683	Jung et al., 2006
	1	AOB	40	3.96	472	Jung et al., 2006
	1	tephrite	40	4.75	329	Jung et al., 2006
	1	tephrite	23	3.41	507	Jung et al., 2013
	1	tephrite	23	3.06	576	Jung et al., 2013
	1	melilitite	5	1.9	430	Alibert et al., 1983
	1	melilitite	5	1.2	452	Alibert et al., 1983
	1	basanite	28	4.7	327	Jung et al., 2012
	1	basanite	28	4	344	Jung et al., 2012
	1	basanite	28	4.3	351	Jung et al., 2012
	1	basanite	28	4.5	302	Jung et al., 2012
	1	basanite	28	4	366	Jung et al., 2012
	1	basanite	28	4.1	370	Jung et al., 2012
	1	basanite	28	4.4	324	Jung et al., 2012
	1	basanite	28	4.3	354	Jung et al., 2012
	1	basanite	28	4.3	337	Jung et al., 2012
	1	basanite	28	4.1	365	Jung et al., 2012
	1	AOB	28	3.8	407	Jung et al., 2012
	1	AOB	28	4.2	347	Jung et al., 2012
	1	AOB	28	4	379	Jung et al., 2012
	1	AOB	28	4.5	326	Jung et al., 2012
	1	AOB	28	4.7	353	Jung et al., 2012
	1	basanite	24	4.2	339	Schubert et al., 2015
	1	basanite	24	3.2	505	Schubert et al., 2015
	1	basanite	24	5.1	293	Schubert et al., 2015
	1	basanite	24	3.4	434	Schubert et al., 2015
	1	basanite	24	5	306	Schubert et al., 2015
	1	basanite	24	4.1	360	Schubert et al., 2015
	1	basanite	24	4.7	305	Schubert et al., 2015
	1	basanite	24	3.6	407	Schubert et al., 2015
	1	basanite	24	4.1	408	Schubert et al., 2015
	1	basanite	24	4.7	341	Schubert et al., 2015

## Sheet: Sheet4
French Massif Central
			Age (Ma)	ℇNd(t)	TDM (Ma)	Reference
Neoproterozoic to Early Paleozoic
	1	basalt	366	7.37		Pin and Paquette, 1997
	1	basalt	366	6.11	520	Pin and Paquette, 1997
	1	basalt	366	6.44		Pin and Paquette, 1997
	1	mafic	366	4.79	677	Pin and Paquette, 1997
	1	mafic	366	4.8		Pin and Paquette, 1997
	1	amphibolite	480	3.92	871	Pin and Martini, 1993
	1	amphibolite	480	3.99		Pin and Martini, 1993
	1	amphibolite	480	5.13		Pin and Martini, 1993
	1	amphibolite	480	3.91	867	Pin and Martini, 1993
	1	amphibolite	480	4.71	746	Pin and Martini, 1993
	1	amphibolite	480	3.94		Pin and Martini, 1993
	1	amphibolite	480	4.4		Pin and Martini, 1993
	1	amphibolite	480	4.34		Pin and Martini, 1993
	1	amphibolite	480	6.25		Pin and Martini, 1993
	1	amphibolite	480	6.63		Pin and Martini, 1993
	1	amphibolite	480	5.75		Pin and Martini, 1993
	1	amphibolite	480	5.08	700	Pin and Martini, 1993
	1	basalt	365	4.5	610	Pin and Paquett, 2002
	1	basalt	365	2.64	867	Pin and Paquett, 2002
	1	basalt	365	2.6	862	Pin and Paquett, 2002
	1	basalt	365	4.39	635	Pin and Paquett, 2002
	1	basalt	365	3.45	681	Pin and Paquett, 2002
	1	basalt	365	4.64	686	Pin and Paquett, 2002
	1	basalt	365	5.83	547	Pin and Paquett, 2002
	1	basalt	365	5.76	556	Pin and Paquett, 2002
	1	basalt	365	4.73	648	Pin and Paquett, 2002
	1	basalt	365	2.23	844	Pin and Paquett, 2002
	1	basalt	365	2.95	826	Pin and Paquett, 2002
	1	basalt	365	4.77	620	Pin and Paquett, 2002
	1	basalt	365	4.58	636	Pin and Paquett, 2002
	1	basalt	365	4.12	646	Pin and Paquett, 2002
	1	pyrigarnete	480	4.86		Downes et al., 1989
	1	amph. Pyrigarnet	480	5.06		Downes et al., 1989
	1	pyrigarnete	480	7		Downes et al., 1989
	1	amph.pyrigarnete	480	5.56		Downes et al., 1989
	1	ky eclogite	480	6.27		Berger et al., 2010
	1	ky eclogite	480	8.96		Berger et al., 2010
	1	ky eclogite	480	7.73		Berger et al., 2010
Late Paleozoic
	1	lamprophyre	295	-3.29	933	Turpin et al., 1988
	1	lamprophyre	295	-3.97	953	Turpin et al., 1988
	1	mafic enclave	300	-6.23	1598	Solgadi et al., 2007
	1	mafic enclave	300	-7.5	1302	Solgadi et al., 2007
	1	durbachite	300	-7.25	1200	Solgadi et al., 2007
	1	durbachite	300	-6.51	1334	Solgadi et al., 2007
Cenozoic
	1	basanite	5	6.6	122	Chavel and Jahn, 1984
	1	basanite	5	5.9	187	Chavel and Jahn, 1984
	1	basanite	5	4.2	282	Chavel and Jahn, 1984
	1	basanite	5	6.7	116	Chavel and Jahn, 1984
	1	AOB	5	5.3	211	Chavel and Jahn, 1984
	1	AOB	5	3.7	420	Chavel and Jahn, 1984
	1	basanite	7	5.2	230	Chavel and Jahn, 1984
	1	AOB	7	6	179	Chavel and Jahn, 1984
	1	basanite	7	4.9	300	Chavel and Jahn, 1984
	1	basanite	3	4.6	290	Chavel and Jahn, 1984
	1	nephelinite	3	5.4	234	Chavel and Jahn, 1984
	1	basanite	3	5	242	Chavel and Jahn, 1984
	1	basanite	3	6.4	154	Chavel and Jahn, 1984
	1	basanite	3	5.2	222	Chavel and Jahn, 1984
	1	basanite	1	4.94	268	Chavel and Jahn, 1984
	1	basanite	1	3.9	326	Chavel and Jahn, 1984
	1	AOB	1	4.55	277	Chavel and Jahn, 1984
	1	basanite	1	2.93	399	Chavel and Jahn, 1984
	1	AOB	7	6.85		Chavel and Jahn, 1984
	1	basanite	20	4.37	300	Lenoir et al., 2000
	1	basanite	20	6.12	184	Lenoir et al., 2000
	1	basanite	20	5.13	263	Lenoir et al., 2000
	1	basanite	20	4.37	298	Lenoir et al., 2000
	1	melilitite	62.3	4.51	314	Lenoir et al., 2000
	1	AOB	5	5.1		Downes, 1984
	1	AOB	5	5.2		Downes, 1984
	1	AOB	5	4.6		Downes, 1984
	1	basanite	4	5.6		Downes, 1984
	1	basanite	4	5.5		Downes, 1984
	1	tephrite	5	4.9		Downes, 1984
	1	tephrite	5	4.6		Downes, 1984
	1	tephrite	5	4.5		Downes, 1984
	1	melilitite	15	4.17	314	Alibert et al., 1983
	1	basalt	10	5.74	213	Zangone et al., 1997
	1	basalt	10	6.13	184	Zangone et al., 1997

## Sheet: Sheet5
Armorican Massif
			Age (Ma)	ℇNd(t)	TDM (Ma)	Reference
Neoproterozoic - Early Paleozoic
	1	eclogite	360	4.46	759	Bosse et al., 2000
	1	metagabbro	480	10.17		Bernard-Griffiths et al., 1985
	1	metagabbro	480	7.42		Bernard-Griffiths et al., 1985
		metagabbro	480	9.81		Bernard-Griffiths et al., 1985
	1	eclogite	500	7.6		Bernard-Griffiths et al., 1986
	1	eclogite	500	6.8		Bernard-Griffiths et al., 1986
	1	eclogite	500	7.69		Bernard-Griffiths et al., 1986
	1	eclogite	500	7.27		Bernard-Griffiths et al., 1986
	1	eclogite	500	7.89		Bernard-Griffiths et al., 1986
	1	eclogite	500	7.96	324	Bernard-Griffiths et al., 1986
	1	eclogite	500	5.71	631	Bernard-Griffiths et al., 1986
	1	eclogite	500	7.24	486	Bernard-Griffiths et al., 1986
	1	eclogite	500	4.63	758	Bernard-Griffiths et al., 1986
Late Paleozoic
	1	lamprophyre	304	-2.5	860	Caroff et al., 2015
	1	minette	295	2.44	891	Turpin et al., 1988
	1	minette	295	-1.29	867	Turpin et al., 1988
	1	minette	295	-1.82	841	Turpin et al., 1988
	1	minette	295	-1.21	812	Turpin et al., 1988
	1	kersantite	295	-2.42	894	Turpin et al., 1988
	1	kersantite	295	-1.4	836	Turpin et al., 1988
	1	kersantite	295	-2.12	897	Turpin et al., 1988
	1	kersantite	295	-1.05	838	Turpin et al., 1988
	1	kersantite	295	-3.77	988	Turpin et al., 1988
	1	kersantite	295	-1.88	893	Turpin et al., 1988
Mesozoic
	1	basalt	200	-1.22		Jourdan et al., 2003
	1	basalt	200	0.17		Jourdan et al., 2003
	1	basalt	200	-0.2		Jourdan et al., 2003
	1	basalt	200	-0.62		Jourdan et al., 2003
	1	basalt	200	0.55		Jourdan et al., 2003
	1	basalt	200	-0.58		Jourdan et al., 2003

## Sheet: Sheet6
Pyrenees
			Age (Ma)	ℇNd(t)	TDM (Ma)	References
Early Paleozoic
	1	mafic rock	470	4.15	775	Vila and Pin, 2016
	1	mafic rock	470	5.03	643	Vila and Pin, 2016
Late Paleozoic
	1	ultarmafic	330	-1.73	1533	Galan et al., 1996
	1	ultramafic	330	-3.49		Galan et al., 1996
	1	ultramafic	330	-2.31		Galan et al., 1996
	1	ultramafic	330	-2.94	1717	Galan et al., 1996
	1	ultramafic	330	-1.94	1375	Galan et al., 1996
	1	ultramafic	330	-1.33		Galan et al., 1996
	1	ultramafic	330	-2.06		Galan et al., 1996
	1	mafic	330	-1.91	1253	Galan et al., 1996
	1	mafic	330	-3.77	1520	Galan et al., 1996
	1	mafic enclave	330	-1.88	1241	Galan et al., 1996
	1	basalt	310	-5.87	1446	Gilbert et al., 1994
	1	bas.andesite	310	-6.24	1385	Gilbert et al., 1994
	1	basalt	310	-5.2	1357	Gilbert et al., 1994
	1	gabbro	307	-2.48	1351	Roberts et al., 2000
	1	gabbro	307	-5.76	1421	Roberts et al., 2000
	1	hornblendite	307	-4.46	1495	Roberts et al., 2000
	1	hornblendite	307	-1	1003	Roberts et al., 2000
	1	diorite	307	-2.81	1431	Roberts et al., 2000
	1	diorite	307	-6.35	1770	Roberts et al., 2000
	1	diorite	307	-5.23	1587	Roberts et al., 2000
	1	gabbro/cortlandite	282	-2.59	1350	Vila et al., 2005
	1	gabbro	282	-3.1	1288	Vila et al., 2005
	1	gabbro	282	-2.23	1196	Vila et al., 2005
	1	cortlandite	282	-4.98	1501	Ben Othman et al., 1984
	1	Hb gabbro	282	-2.89	1140	Ben Othman et al., 1984
	1	gabbro	282	-4.83	1239	Ben Othman et al., 1984
	1	gabbro	267	-3.28	1083	Denele et al., 2011
Mesozoic and Cenozoic
	1	alkali basalt	190	6.4	357	Alibert, 1985
	1	alkali basalt	190	4.6	527	Alibert, 1985
	1	Diabase	190	1.5		Alibert, 1985
	1	Diabase	190	-0.6		Alibert, 1985
	1	Diabase	190	1.1		Alibert, 1985
	1	Diabase	190	0.8		Alibert, 1985
	1	Diabase	190	0.2		Alibert, 1985
	1	Diabase	190	2.3		Alibert, 1985
	1	Diabase	190	1.3		Alibert, 1985
	1	basalt	90	2.46	548	Rossy et al., 1992
	1	basalt	90	5.28	302	Rossy et al., 1992
	1	basalt	90	3.94	379	Rossy et al., 1992
	1	basalt	90	3.47	455	Rossy et al., 1992
	1	teschenite	90	4.36	374	Rossy et al., 1992
	1	teschenite	90	2.96	472	Rossy et al., 1992
	1	teschenite	90	6.09	258	Rossy et al., 1992
	1	picrite	90	2.79	637	Rossy et al., 1992
	1	basalt	90	3.43	434	Rossy et al., 1992
	1	lamprophyre	90	2.59	450	Rossy et al., 1992
	1	monchiquite	90	4.2	353	Rossy et al., 1992
	1	monchiquite	90	3.7	389	Rossy et al., 1992
	1	Ne-syenite	90	2.84	380	Rossy et al., 1992
	1	basalt	100	3.55	447	Ubide, 2013
	1	basalt	100	3.5	438	Ubide, 2013
	1	basalt	100	3.74	436	Ubide, 2013
	1	basalt	100	4.23	333	Ubide, 2013
	1	lamprophyre	90	3.24	432	Ubide, 2013
	1	lamprophyre	90	2.91	420	Ubide, 2013
	1	lamprophyre	90	2.62	386	Ubide, 2013
	1	lamprophyre	80	3.55	422	Ubide, 2013
	1	lamprophyre	80	3.73	424	Ubide, 2013
	1	lamprophyre	80	3.6	413	Ubide, 2013
	1	lamprophyre	80	4.39	413	Ubide, 2013
	1	lamprophyre	80	3.29	453	Ubide, 2013
	1	lamprophyre	80	3.1	445	Ubide, 2013
	1	albitite	100	2.39	354	Pin et al., 2006
	1	albitite	100	3.38	314	Pin et al., 2006
	1	albitite	100	2.58	424	Pin et al., 2006
	1	albitite	100	1.92	461	Pin et al., 2006
	1	albitite	100	2.31	473	Pin et al., 2006
	1	albitite	100	2.91	441	Pin et al., 2006
	1	albitite	100	3.47	362	Pin et al., 2006
